# Supplementary material for: Morphology and Phylogeny Reveal Vamsapriyaceae fam. nov. (Xylariales, Sordariomycetes) with Two Novel Vamsapriya Species
Source: MDPI journal article supplement (doi:10.3390/jof7110891), 2021-10-21
Supplement: s1 [file s1]

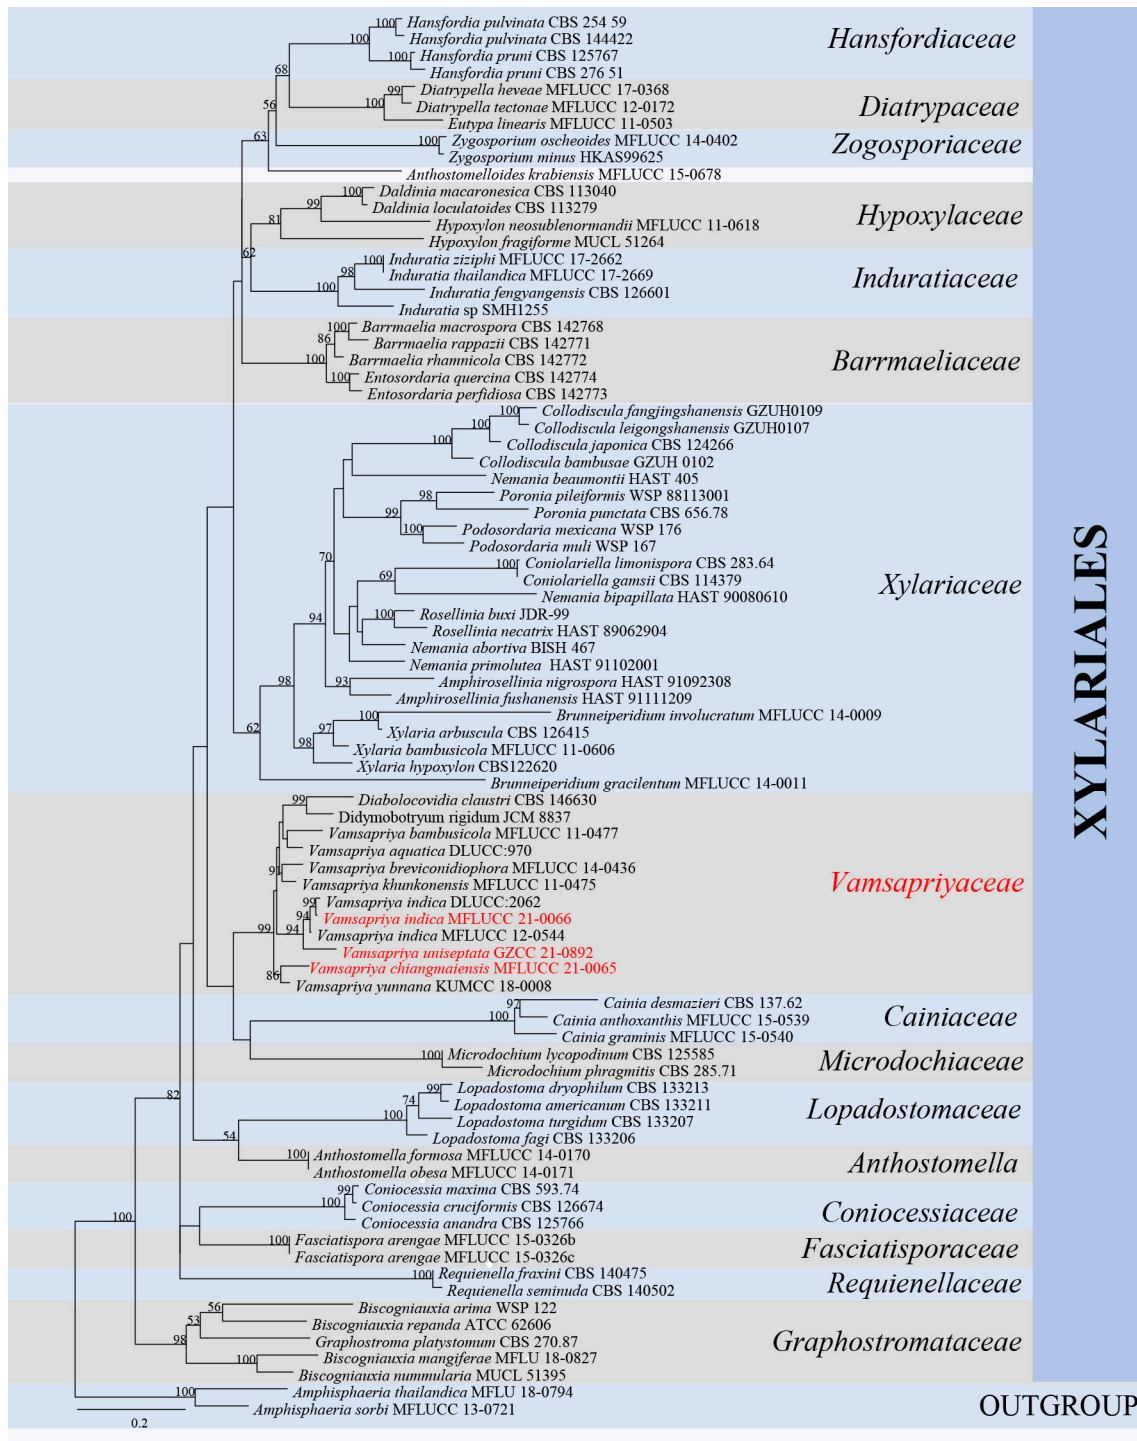

**Figure S1.** Maximum likelihood (RAxML) tree based on ITS sequence data. The tree is rooted with *Amphisphaeria sorbi* (MFLUCC 13-0721) and *A. thailandica* (MFLU 18-0794).

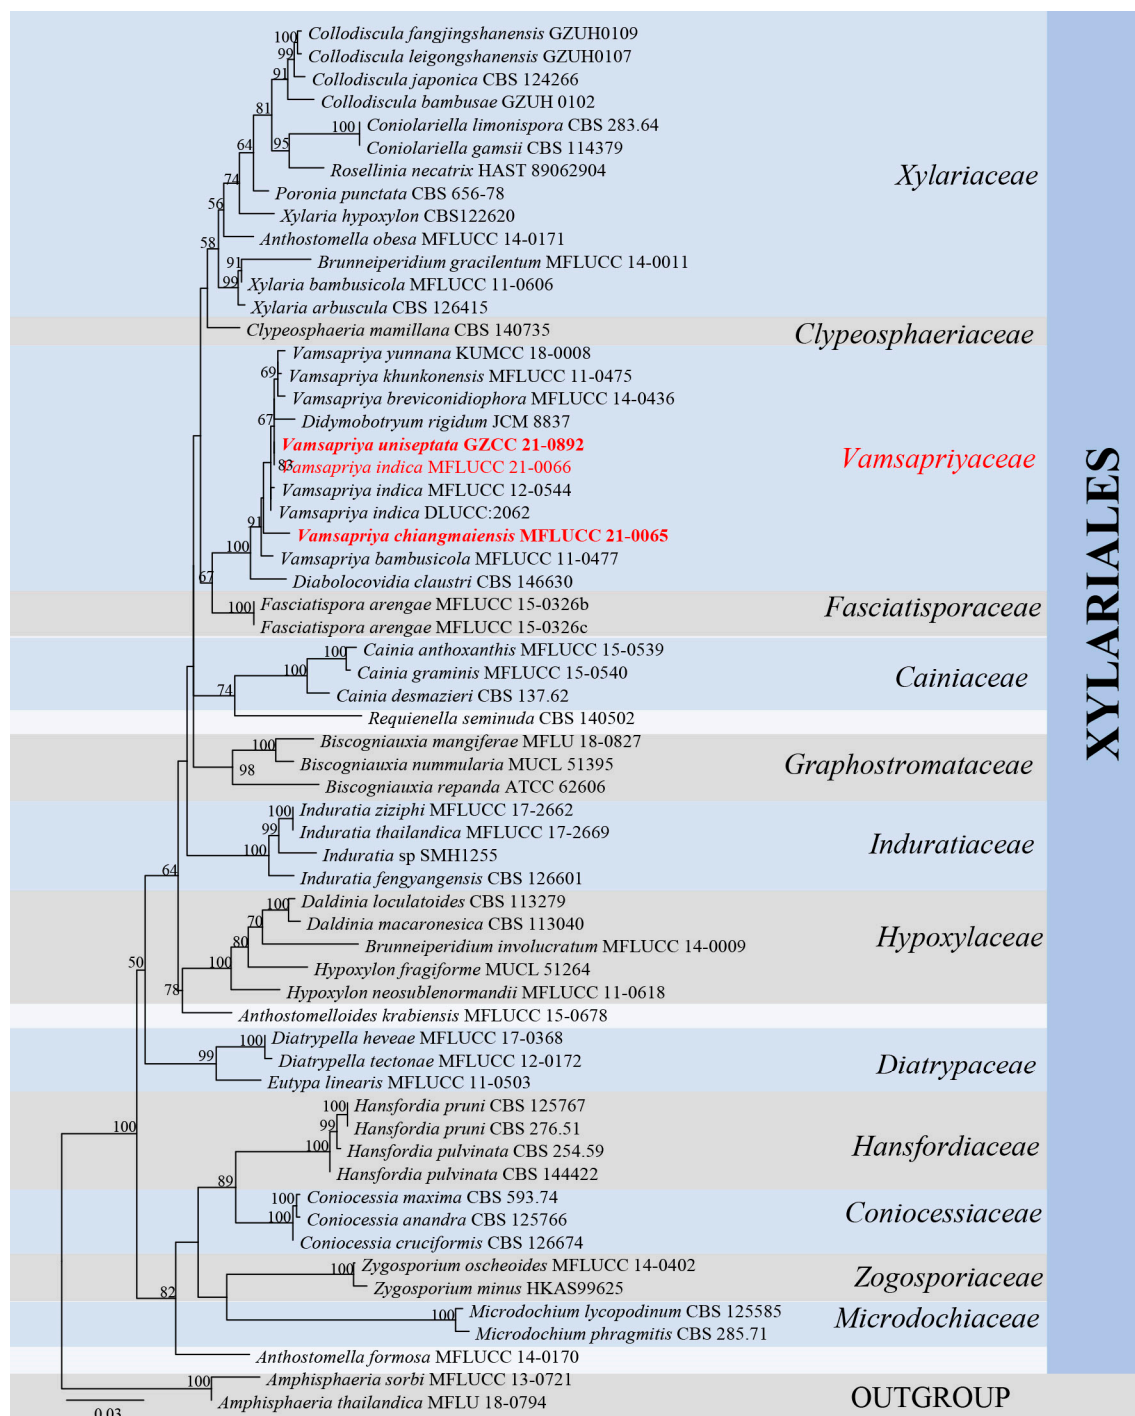

**Figure S2.** Maximum likelihood (RAxML) tree based on *LSU* sequence data. The tree is rooted with *Amphisphaeria sorbi* (MFLUCC 13-0721) and *A. thailandica* (MFLU 18-0794).

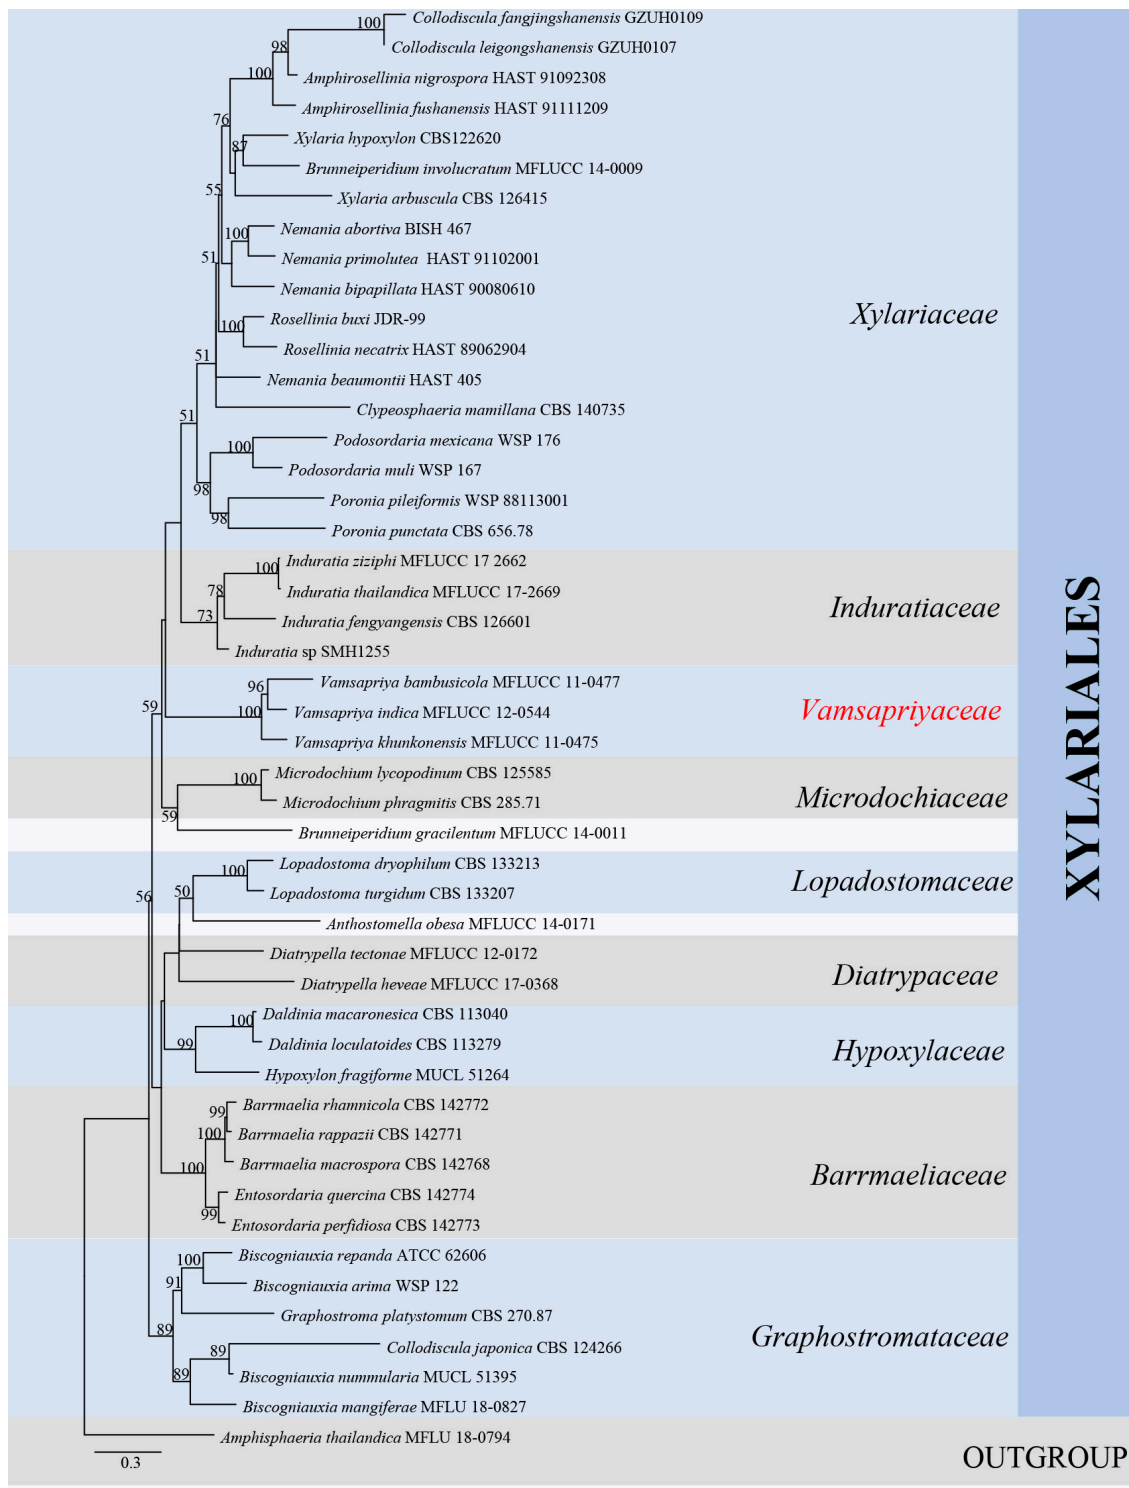

**Figure S3.** Maximum likelihood (RAxML) tree based on tub sequence data. The tree is rooted with *A. thailandica* (MFLU 18-0794).

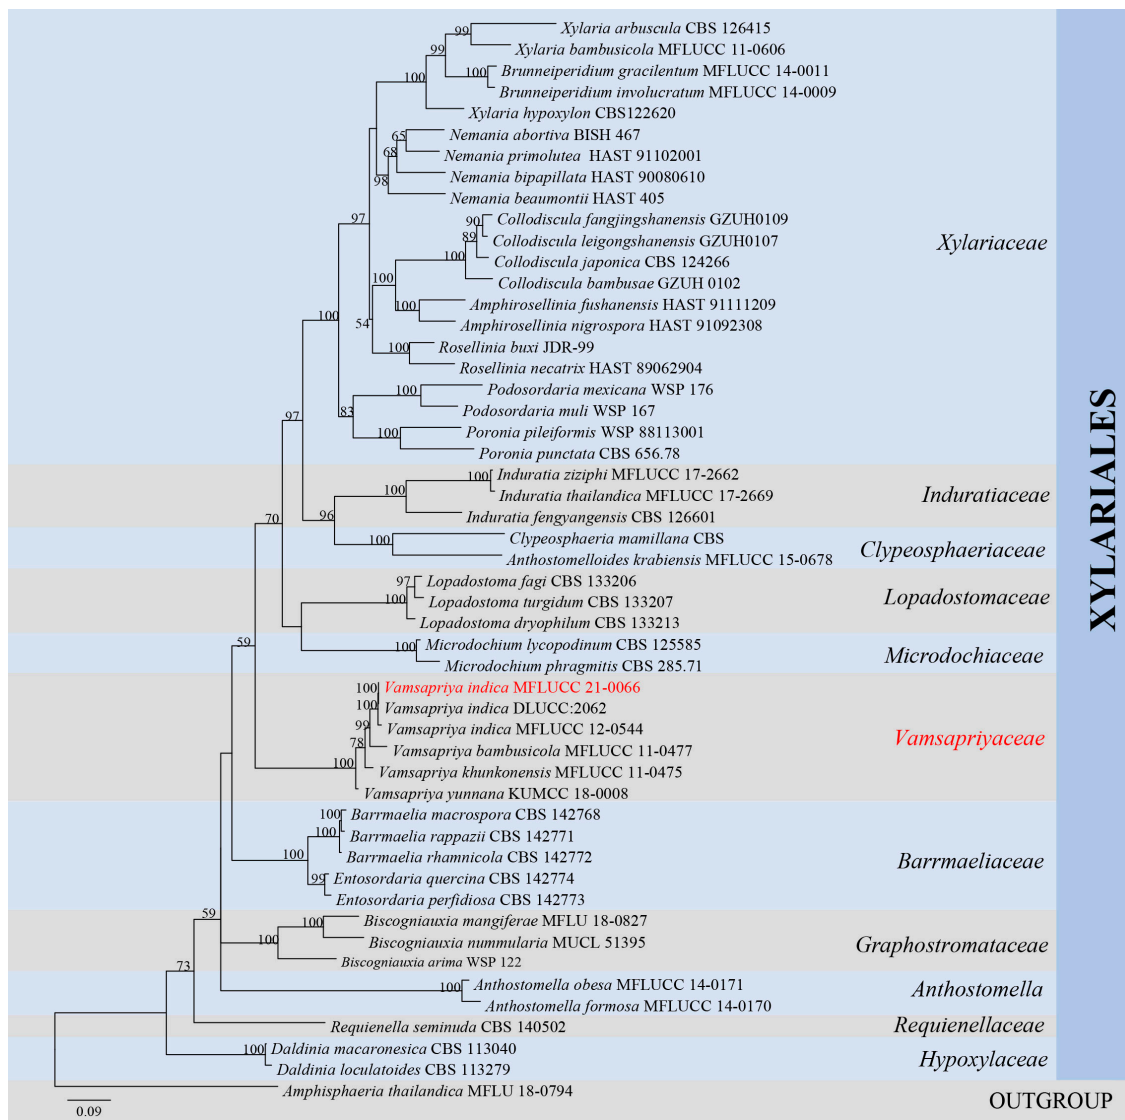

**Figure S4.** Maximum likelihood (RAxML) tree based on rpb2 sequence data. The tree is rooted with *A. thailandica* (MFLU 18-0794).
